# Supplementary material for: Morpho-molecular Identification and Chemical control of Alternaria alternata,causing leaf blight of Gardenia jasminoides Eills in China
Source: Research Square preprint supplement (doi:10.21203/rs.3.rs-961196/v1), 2021-11-01
Supplement: Supplementary file 1 [file 4434e69b1e075d43c4b3b768.docx]

| COMMERCIAL PRODUCT | ACTIVE INGREDIENT | COMPANY |
| --- | --- | --- |
| Chemicals |  |  |
| Hexaconazole | hexaconazole | Guangdong Zhongxun Agricultural Science Co., Ltd, CHINA |
| Xin Jun Ma Lin Gua | Moroxydine hydrochloride Octreotide acetate | Qingdao Runtian Biotechnology Co., Ltd, CHINA |
| Tricyclazole | Tricyclazole | Guangdong Zhongxun Agricultural Science Co., CHINA |
| Jia Ji Liu Junling | Thiophanate-Methyl | Guangdong Zhongxun Agricultural Science Co., Ltd, CHINA |
| 5-Xiao Duojunling | Carbendazim Pentachloronitrobenzene | Guangdong Zhongxun Agricultural Science Co., Ltd, CHINA |
| Bai Junqing | Chlorothalonil | Bannong Sida (Beijing) Agro-Chemicals Co., Ltd, CHINA |
| Duo Junling | carbendazim | Shanghai Yilian Chemical Co., Ltd,, CHINA |
| Dai Sengxin | Dithane z-78 | Qingdao Runtian Biotechnology Co., Ltd, CHINA |
| Jia Ji Tuo Bu Jing | Thiophanate-Methyl | Qingdao Runtian Biotechnology Co., Ltd, CHINA |
| Fu Meishuang | thiram | Beijing Green Agricultural Science and Technology Goup Co., Ltd, CHINA |
| Biological |  |  |
| Oligosaccharins | oligosaccharins | Beijing Green Agricultural Science and Technology Goup Co., Ltd, CHINA |
| Streptomycin | streptomycin | Qingdao Runtian Biotechnology Co., Ltd, CHINA |
| Streptomycin sulfate | Streptomycin sulfate | Beijing Boaotuo Technology Goup Co., Ltd, CHINA |
| Oxytetracycline | Oxytetracycline | Beijing Boaotuo Technology Goup Co., Ltd, CHINA |
| Gentamycin sulfate | Gentamycin sulfate | Beijing Boaotuo Technology Goup Co., Ltd, CHINA |

Table.1 Fungicides and biocontrol agents used for in vitro testing

Table 2 The toxicity comparison of 15 kinds of fungicides to Alternaria alternata.

| ACTIVE INGREDIENT | Concentration（ppm） | GR（%） | EC50（ppm） |
| --- | --- | --- | --- |
| Thiram | 10 | 1.03 | 67.92 |
| 30 | 15.94 |
| 50 | 34.96 |
| 70 | 49.61 |
| 100 | 69.73 |
| Thiophanate-Methyl | 20 | 25.08 | 47.53 |
| 40 | 52.77 |
| 80 | 65.23 |
| 120 | 71.48 |
| 200 | 76.67 |
| Chlorothalonil | 1 | 9.87 | 40.92 |
| 10 | 32.46 |
| 50 | 48.34 |
| 100 | 61.55 |
| 150 | 70.69 |
| Dithane z-78 | 10 | 6.80 | 73.52 |
| 100 | 38.88 |
| 300 | 90.73 |
| 400 | 94.85 |
| 500 | 94.90 |
| Thiophanate-Methyl | 100 | 0.29 | 714.49 |
| 300 | 18.98 |
| 500 | 37.75 |
| 700 | 49.43 |
| 1000 | 57.84 |
| Moroxydine hydrochloride Octreotide acetate | 50 | 11.31 | 311.17 |
| 100 | 21.84 |
| 150 | 28.35 |
| 200 | 38.93 |
| 250 | 45.79 |
| carbendazim | 100 | 5.29 | 481.95 |
| 300 | 29.48 |
| 500 | 47.74 |
| 700 | 64.35 |
| 1000 | 80.94 |
| Tricyclazole | 50 | 19.44 | 151.36 |
| 100 | 28.79 |
| 150 | 40.09 |
| 200 | 57.83 |
| 250 | 78.52 |
| Carbendazim  Pentachloronitrobenzene | 100 | 0.93 | 554.63 |
| 300 | 23.48 |
| 500 | 40.29 |
| 700 | 61.84 |
| 1000 | 79.75 |
| Hexaconazole | 1 | 18.09 | 14.45 |
| 10 | 30.85 |
| 30 | 56.38 |
| 50 | 75.89 |
| 70 | 77.48 |
| Oxytetracycline | 10 | 0.35 | 426.58 |
| 100 | 8.69 |
| 500 | 42.02 |
| 1000 | 83.87 |
| 1500 | 84.57 |
| Streptomycin sulfate | 1 | 4.64 | 216.82 |
| 10 | 31.25 |
| 100 | 49.82 |
| 1000 | 52.86 |
| 1500 | 54.46 |
| Gentamycin sulfate | 100 | 8.37 | 468.81 |
| 200 | 12.39 |
| 500 | 38.43 |
| 1000 | 59.58 |
| 1500 | 98.29 |
| Oligosaccharins | 200 | 15.96 | 1196.74 |
| 500 | 27.30 |
| 1000 | 39.46 |
| 1500 | 52.94 |
| 2000 | 69.33 |
| Streptomycin | 200 | 1.43 | 8912.51 |
| 500 | 5.24 |
| 1000 | 9.67 |
| 1500 | 15.55 |
| 2000 | 19.81 |
